# Supplementary figures and images for: Alterations of the Ceramide Metabolism in the Peri-Infarct Cortex Are Independent of the Sphingomyelinase Pathway and Not Influenced by the Acid Sphingomyelinase Inhibitor Fluoxetine
Source: Hindawi journal article supplement (doi:10.1155/2015/503079), 2015-01-01

**A**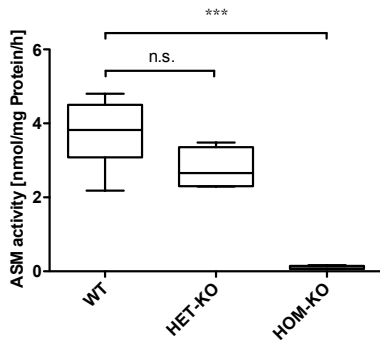**B**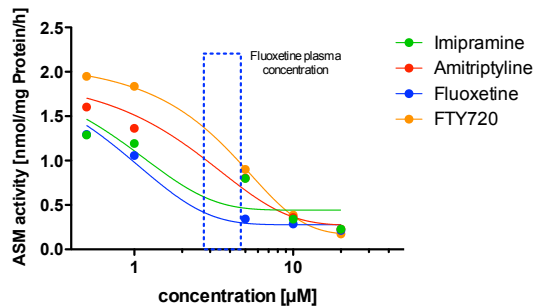**C**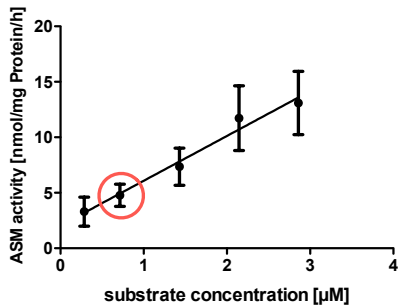**D**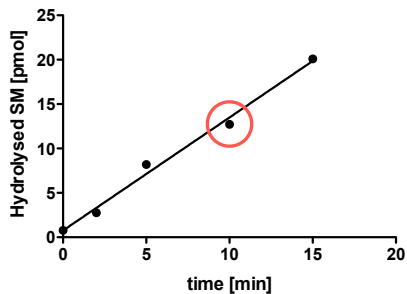

Supplement: f1 [file 503079.f1.zip]

A

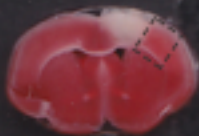

B

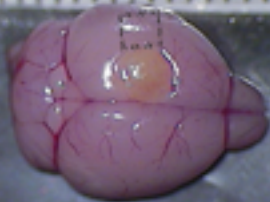

Supplement: f1 [file 503079.f1.zip]

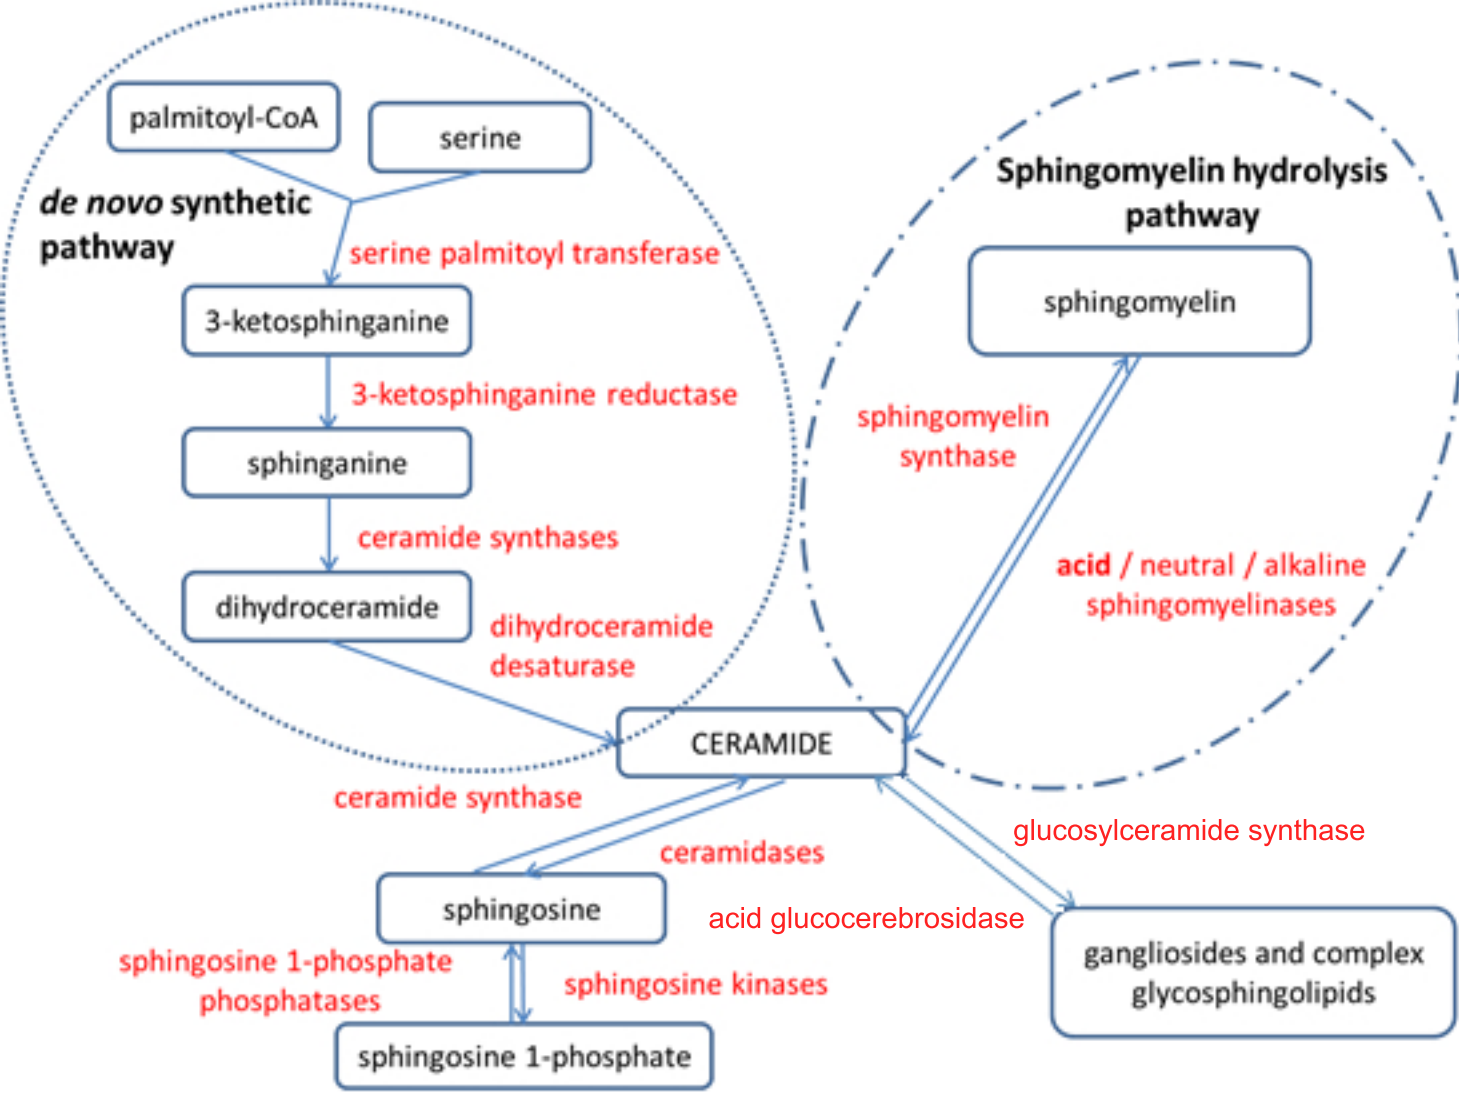

Supplement: f1 [file 503079.f1.zip]
